# Supplementary material for: Identification of a Developmental Switch in Information Transfer between Whisker S1 and S2 Cortex in Mice
Source: J Neurosci. 2022 Jun 1;42(22):4435–48. doi: 10.1523/JNEUROSCI.2246-21.2022 (PMC9172289; doi:10.1523/JNEUROSCI.2246-21.2022)
Supplement: Figure 3-1 — WS1 and wS2 L4 duration of evoked MUA in P3-P5, P6-P8, P14-P16 and P25-P56, both regions mean firing rate between 100-200ms (spikes/s) and both regions evoked onset times are indicated in the tables. The values of mean and s.e.m for each group, the significance of one-way ANOVA with Bonferroni's multiple comparison and p values and t values of the paired t test are also indicated in the table. Download Figure 3-1, XLSX file. [file ns-JN-RM-2246-21-s03.xlsx]

## Sheet: Sheet1
Figure3C2 - wS1 wS2 duration in L4 (s)
	P3-5	P6-8	P14-16	P25-56		One-way analysis of variance						P3-5	P6-8	P14-16	P25-56		One-way analysis of variance
	wS1	wS1	wS1	wS1		P value			< 0.0001			wS2	wS2	wS2	wS2		P value			0.0004
	0.541	5.91	1.388	0.06		Bonferroni's Multiple Comparison Test			Significant			0.515	1.555	0.093	0.068		Bonferroni's Multiple Comparison Test			Significant
	0.494	3.853	1.663	0.148		P1-wS1 vs P3-5-wS1			***			0.361	0.42	0.155	0.125		P1-wS2 vs P3-5-wS2			**
	0.48	4.577	0.96	0.409		P1-wS1 vs P6-8-wS1			ns			0.241	0.192	0.171	0.113		P1-wS2 vs P6-8-wS2			ns
	0.415	1.542	1.337	0.154		P1-wS1 vs P14-wS1			ns			0.28	1.023	0.253	0.078		P1-wS2 vs P14-wS2			ns
	0.59	4.252	0.492	0.136		P3-5-wS1 vs P6-8-wS1			***			0.186	0.392	0.09	0.063		P3-5-wS2 vs P6-8-wS2			***
	0.49	1.681	0.422	0.165		P3-5-wS1 vs P14-wS1			***			0.415	1.388	0.095	0.106		P3-5-wS2 vs P14-wS2			***
		1.647	0.494	0.163		P6-8-wS1 vs P14-wS1			ns				0.734	0.111	0.107		P6-8-wS2 vs P14-wS2			ns
		4.031	0.379	0.141									1.252	0.087	0.056
			0.401											0.072
			0.452											0.058
Mean	0.501667	3.43662	0.7988	0.172							Mean	0.333	0.8695	0.1185	0.0895
sem	0.0241698	0.57452	0.156112	0.0358569							sem	0.0495022	0.180082	0.0185785	0.00926784
Figure3D2 - wS1 wS2 mean firing rate in L4 (spikes/s)
	P3-5	P6-8	P14-16	P25-56		One-way analysis of variance						P3-5	P6-8	P14-16	P25-56		One-way analysis of variance
	wS1	wS1	wS1	wS1		P value			< 0.0001			wS2	wS2	wS2	wS2		P value			0.0002
	162.9	261.1	70.6	72.3		Bonferroni's Multiple Comparison Test			Significant			121.7	221.2	22.1	51.6		Bonferroni's Multiple Comparison Test			Significant
	182.2	141.3	247.8	36.3		P1-wS1 vs P3-5-wS1			ns			101.3	66.9	37.9	9.1		P1-wS2 vs P3-5-wS2			ns
	102	224	169.4	164.2		P1-wS1 vs P6-8-wS1			ns			121.9	37.8	70.8	74.8		P1-wS2 vs P6-8-wS2			***
	168.7	191.1	267.9	92.5		P1-wS1 vs P14-wS1			ns			125.5	96.3	95.5	12.8		P1-wS2 vs P14-wS2			***
	151.7	214.1	248.2	59.7		P3-5-wS1 vs P6-8-wS1			ns			125.4	53.8	57.5	22.3		P3-5-wS2 vs P6-8-wS2			ns
	101.6	105.7	210.6	71.4		P3-5-wS1 vs P14-wS1			**			134.4	107.4	7.4	14.7		P3-5-wS2 vs P14-wS2			ns
		78	240	116.9		P6-8-wS1 vs P14-wS1			***				30.9	25.2	32.7		P6-8-wS2 vs P14-wS2			ns
		233.1	202.6	68.3									53.4	25.3	38.8
			227.8											1.5
			160											2.3
Mean	144.85	181.05	204.49	85.2							Mean	121.7	83.4625	34.55	32.1
sem	14.193	23.1579	18.4961	14.0045							sem	4.49303	21.8007	9.86822	7.96093
Figure3E2 - wS1 wS2 onset in L4 (ms)										The extended data Figure3-1 supports Figure3. WS1 and wS2 L4 duration of evoked MUA in P3-5, P6-8, P14-16 and P25-56, both regions mean firing rate between 100-200ms (spikes/s) and both regions evoked onset times are indicated in the tables. The values of mean and s.e.m for each group, the significance of one-way ANOVA with Bonferroni's multiple comparison and p-values and t-values of the paired …
	P3-5		P6-8		P14-16		P25-56
	wS1	wS2	wS1	wS2	wS1	wS2	wS1	wS2
	46	58	18	35	10	15	6	11
	41	70	32	52	9	14	4	6
	39	50	30	61	10	18	5	7
	33	47	33	51	10	15	6	9
	35	62	21	54	12	16	8	19
	41	55	29	45	11	18	7	15
			35	65	9	14	4	11
			20	52	9	14	6	12
					11	13
					12	17
Mean	39.1667	57	27.25	51.875	10.3	15.4	5.75	11.25
sem	1.90467	3.40588	2.32801	3.25378	0.366667	0.561743	0.49099	1.49702
	P1 wS1 vs wS2		P3-5 wS1 vs wS2		P6-8 wS1 vs wS2		P14 wS1 vs wS2
	p value	t value	p value	t value	p value	t value	p value	t value
Paired t test	0.0028	5.4703	< 0.0001	9.30886	< 0.0001	10.1105	0.0017	4.91935
